# Supplementary material
Source: PubMed Central journal article supplement (PMC8956154)
Supplement: NIHMS1771129-supplement-2.pdf [file NIHMS1771129-supplement-2.pdf]

# RNA-Seq Reads of Adipocyte and Liver *Arid5b* expression - Exon 6 on HFD

## Adipocyte

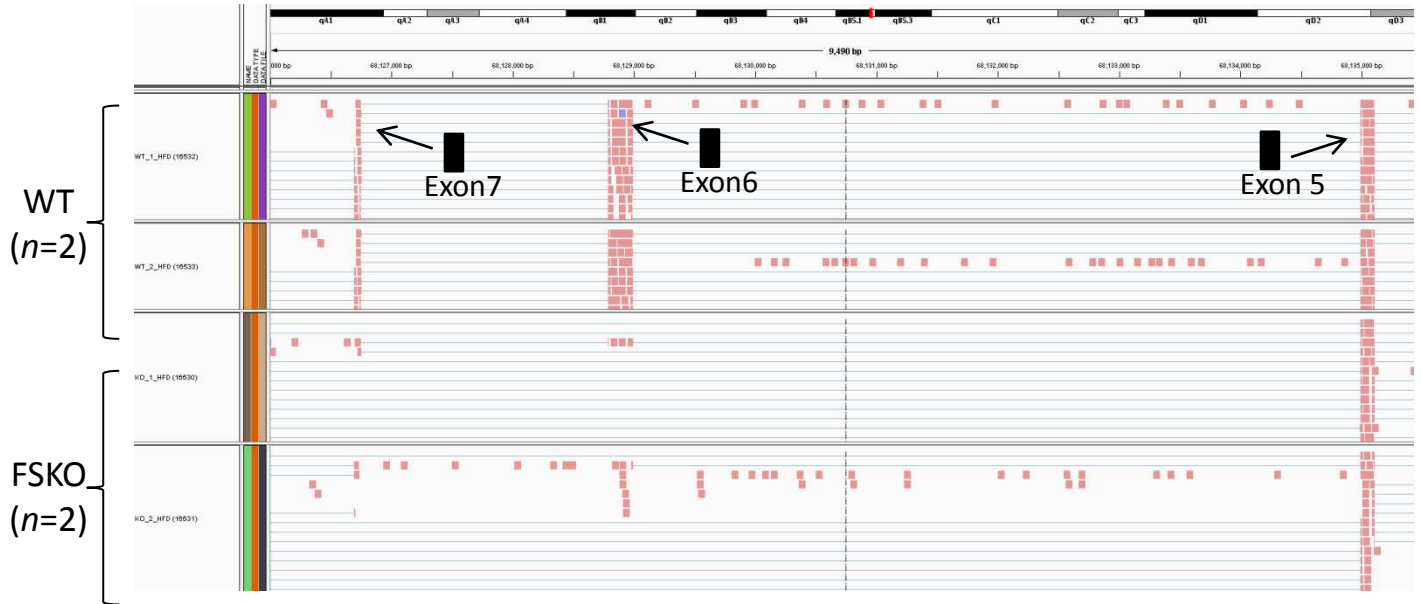

## Liver

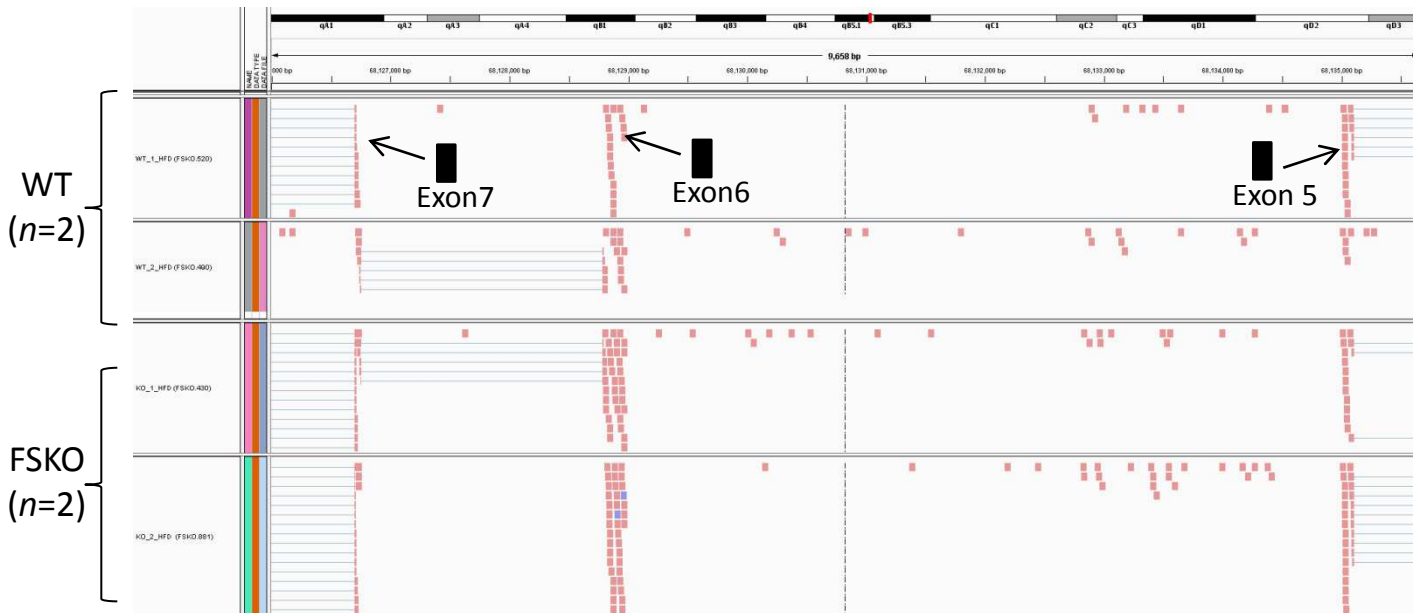

**Supplemental Figure 1.** Deletion of *Arid5b* Exon 6 in purified adipocytes but not in livers from mice fed a high fat diet (HFD). RNA-Seq was performed as described in materials and methods. Read files were aligned to the mm10 assembly surrounding *Arid5b* Ex 6

Supplemental Figure 1.
